# Supplementary material
Source: Springer Nature journal article supplement (https://www.springermedizin.de/resource/supplementary/12913_2012_2394_MOESM1_ESM.pdf/9530562)

**28 days**

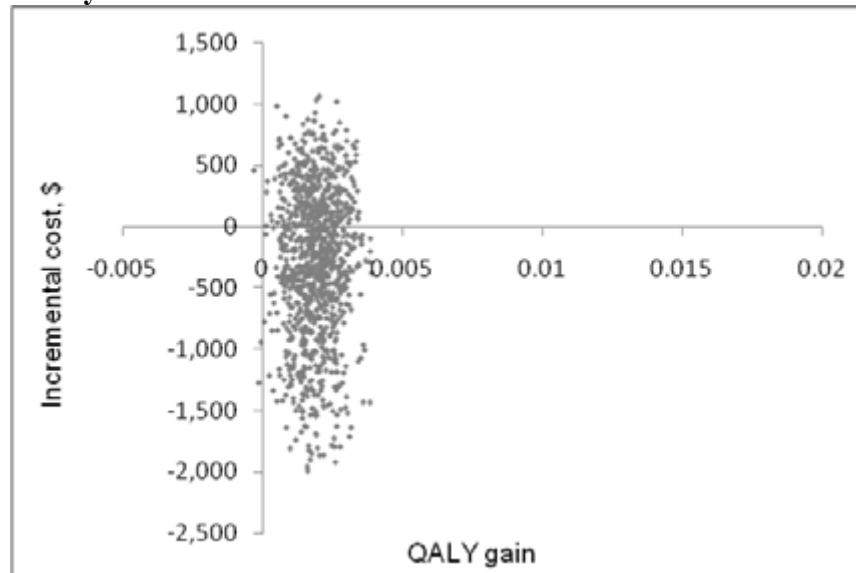

**84 days**

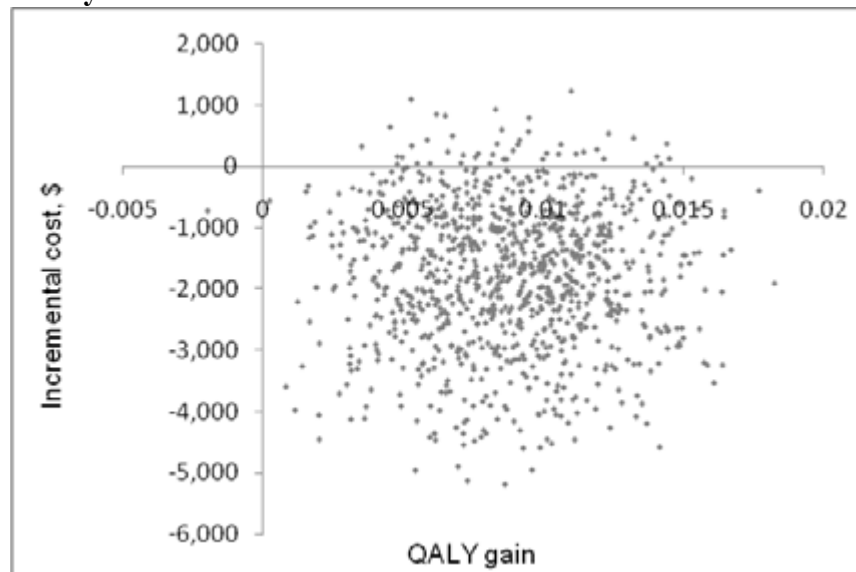

Supplement: MOESM1 [file 9530562]
